# Supplementary material for: Imageological/Structural Study regarding the Improved Pharmacokinetics by 68Ga-Labeled PEGylated PSMA Multimer in Prostate Cancer
Source: MDPI journal article supplement (doi:10.3390/ph16040589), 2023-04-14
Supplement: s1 [file s1]

## Supporting Information for

# Imageological/structural study regarding the improved pharmacokinetics by $^{68}\text{Ga}$ -labeled PEGylated PSMA multimer in Prostate Cancer

Huihui Zhang<sup>1†</sup>, Maohua Rao<sup>1†</sup>, Huayi Zhao<sup>1</sup>, Jianli Ren<sup>3</sup>, Meng Zhong<sup>4</sup>, Lan Hao<sup>3</sup>, Yue Chen<sup>2</sup>, Xia Yang

<sup>5</sup>, Yue Feng <sup>2\*</sup>, Gengbiao Yuan<sup>1\*</sup>

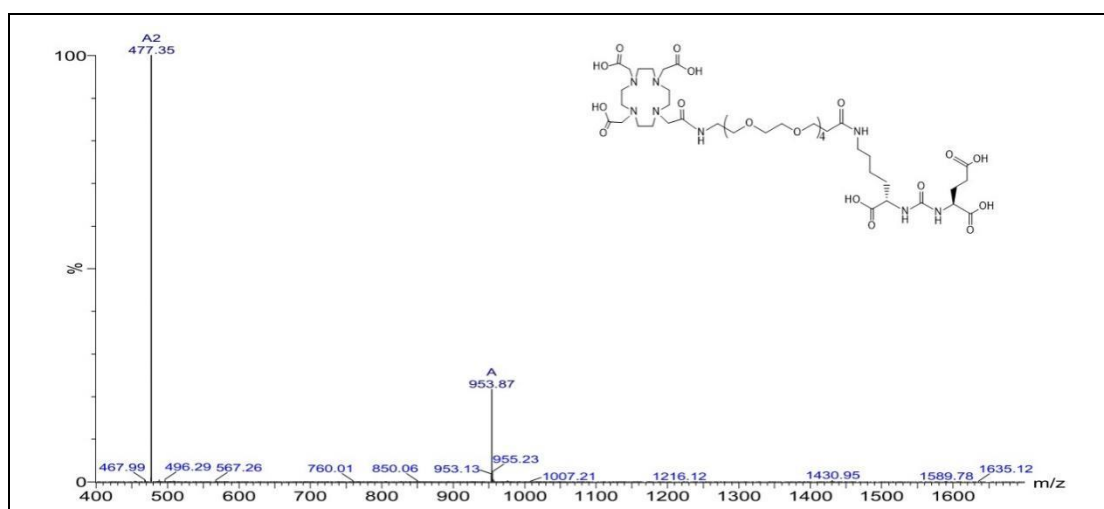

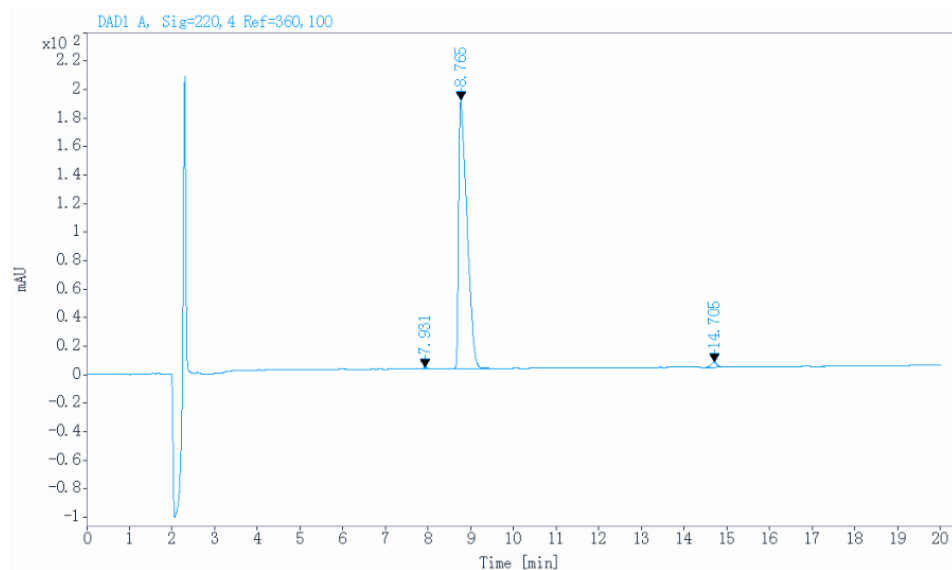

Signal: DAD1 A, Sig=220, 4 Ref=360, 100

| RT[min] | Type | Width[min] | Area      | Height   | Area%   | Name |
|---------|------|------------|-----------|----------|---------|------|
| 7.931   | BB   | 0.1075     | 5.2580    | 0.7350   | 0.2041  |      |
| 8.765   | BB   | 0.2113     | 2536.7080 | 188.1719 | 98.4531 |      |
| 14.705  | BB   | 0.1493     | 34.5984   | 3.5006   | 1.3428  |      |
| Sum     |      |            | 2576.5644 |          |         |      |

Figure S1. MS spectroscopy and HPLC of DOTA-(1P-PEG<sub>4</sub>)

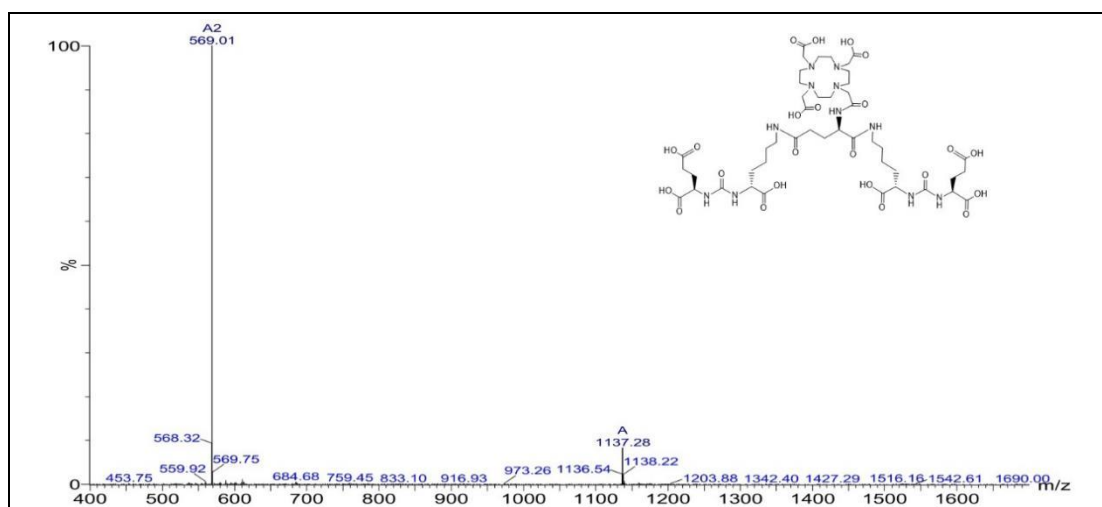



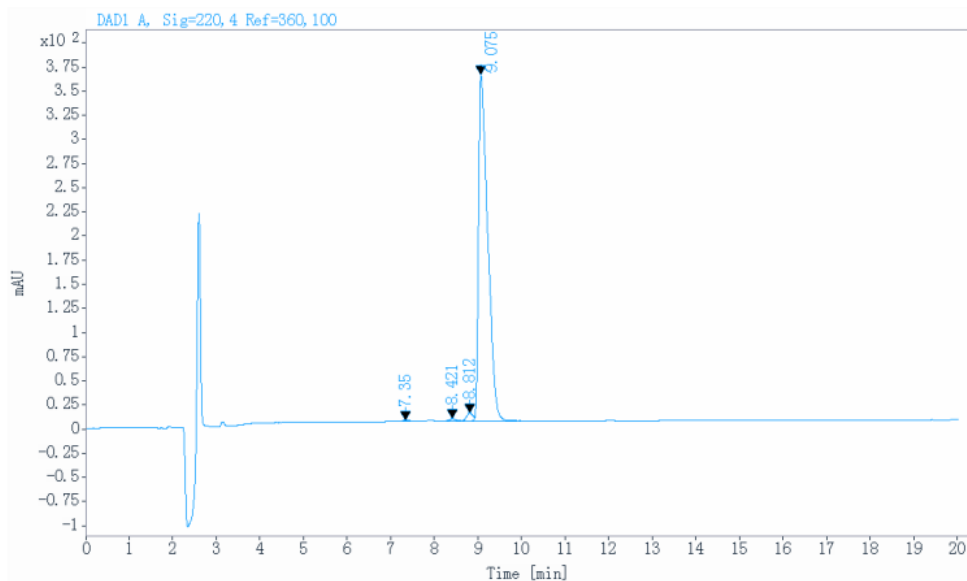

Signal: DAD1 A, Sig=220, 4 Ref=360, 100

| RT[min] | Type | Width[min] | Area      | Height   | Area%   | Name |
|---------|------|------------|-----------|----------|---------|------|
| 7.350   | FM   | 0.1718     | 16.6934   | 1.6197   | 0.3106  |      |
| 8.421   | VV E | 0.1489     | 22.1798   | 2.1763   | 0.4126  |      |
| 8.812   | VV E | 0.1535     | 78.7201   | 8.0911   | 1.4645  |      |
| 9.075   | VB R | 0.2129     | 5257.6250 | 358.8497 | 97.8123 |      |
| Sum     |      |            | 5375.2183 |          |         |      |

Figure S3. MS spectroscopy and HPLC of DOTA-(2P-PEG<sub>4</sub>)

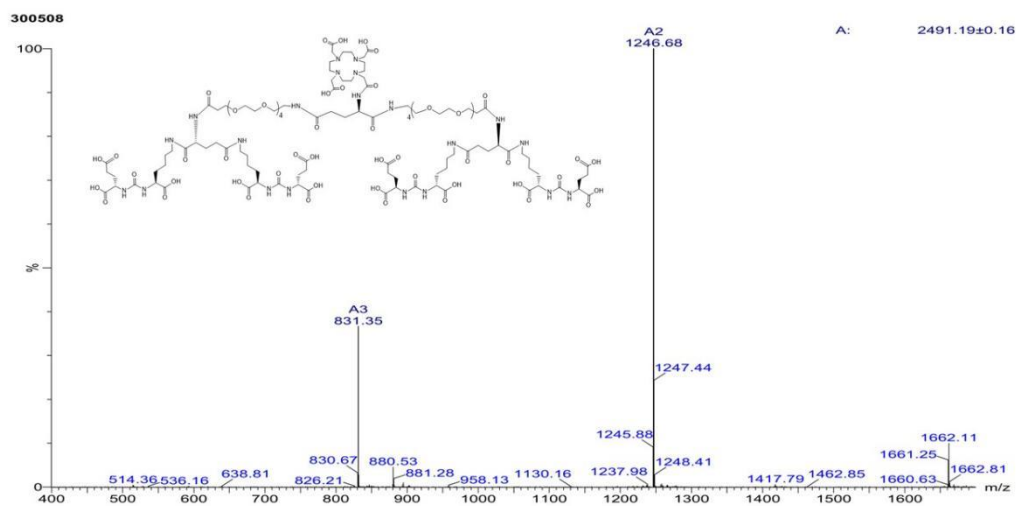

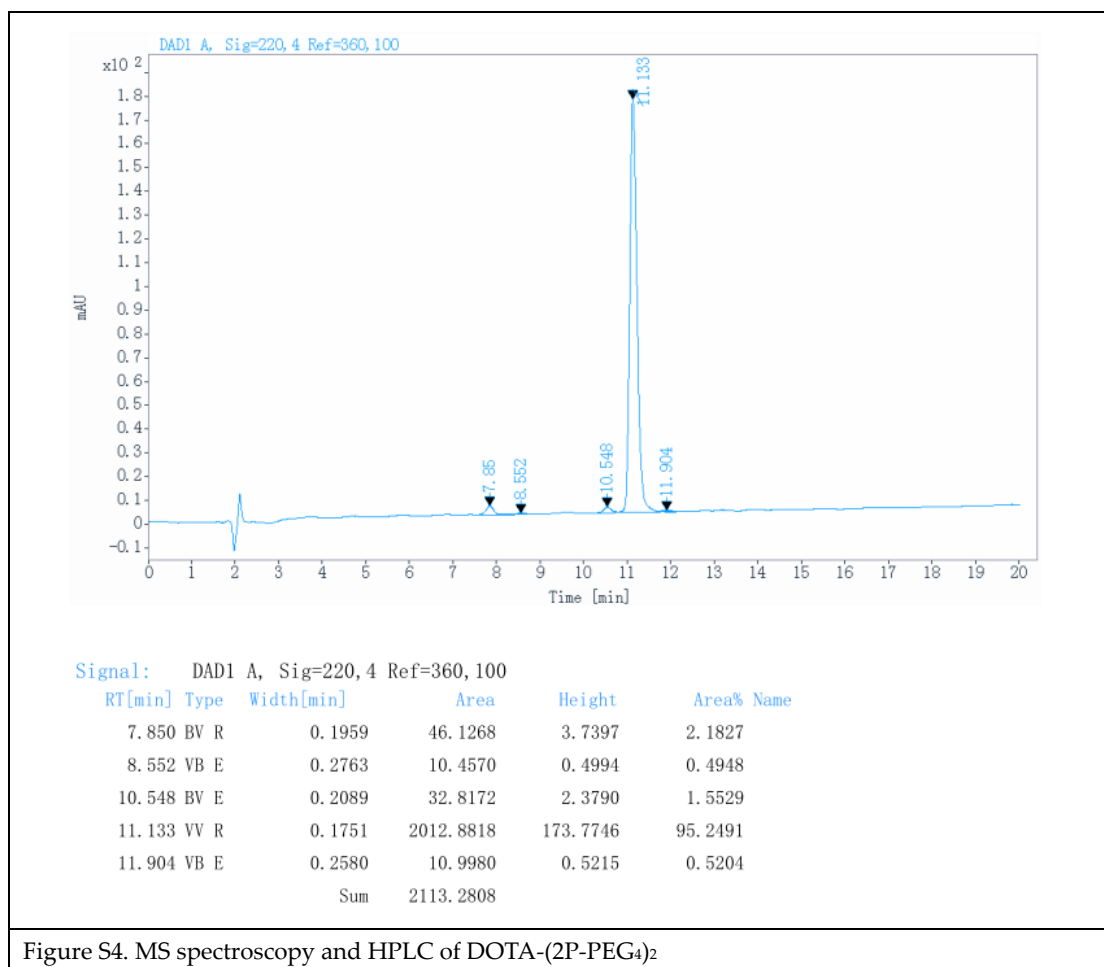

Figure S4. MS spectroscopy and HPLC of DOTA-(2P-PEG<sub>4</sub>)<sub>2</sub>

**Figure S1-4. DOTA- (1P-PEG<sub>4</sub>), DOTA- (2P-PEG<sub>0</sub>), DOTA- (2P-PEG<sub>4</sub>) and DOTA-PEG4- (2P-PEG<sub>4</sub>)<sub>2</sub> chemical structure, mass spectrometry analysis and chemical purity detection.**

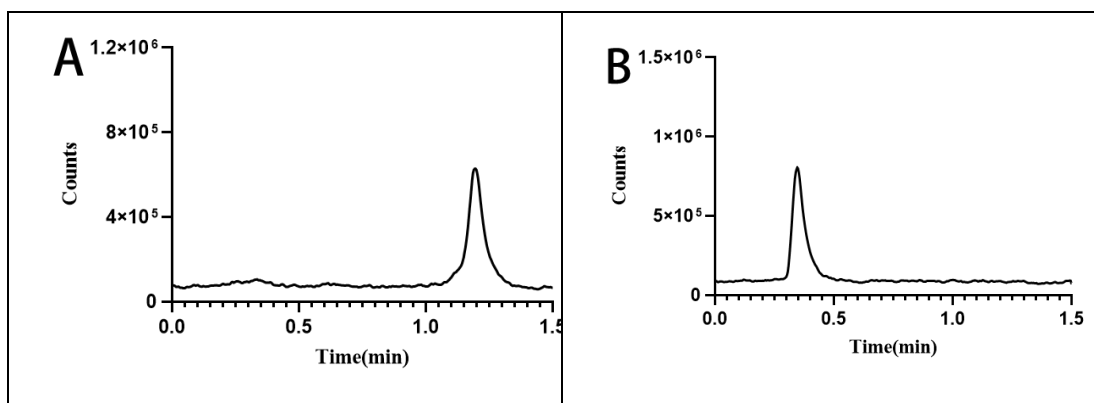

The radiochemical purity by thinlayer chromatography with the mobile phase of 0.1M tri-sodium-citrate to a PH of 5.0. (A):The TLC result of free  $^{177}\text{Lu}$ . (B):The TLC result of  $[^{177}\text{Lu}]\text{Lu-DOTA-(2P-PEG}_4)_2$ .

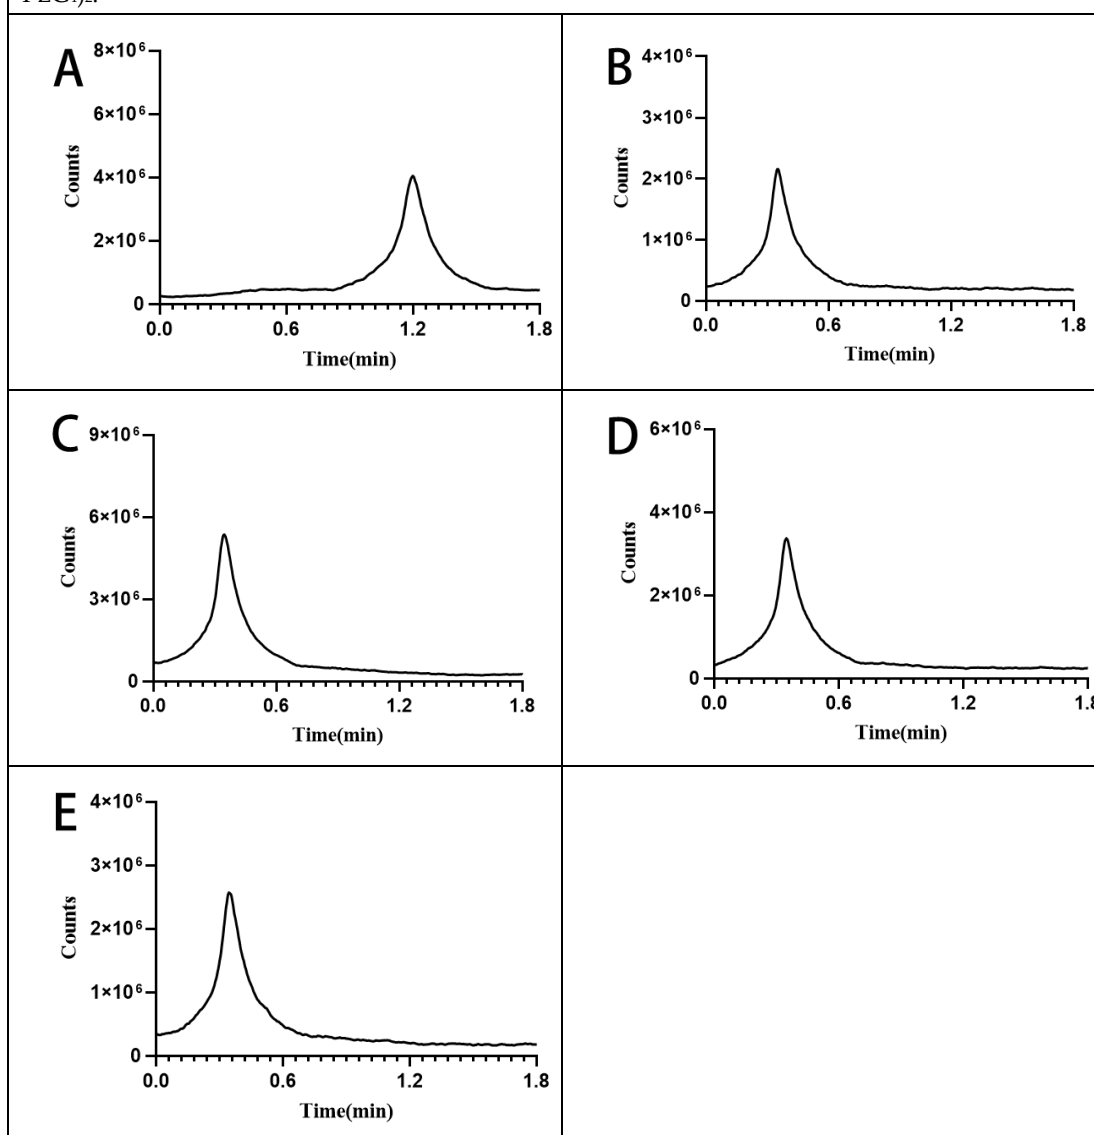

The radiochemical purity by thinlayer chromatography with the mobile phase of 0.1M tri-sodium-citrate to a PH of 5.0. (A):The TLC result of free  $^{68}\text{Ga}$ . (B/C/D/E):The TLC result of  $[^{68}\text{Ga}]\text{Ga-DOTA-(1P-PEG}_4)_2$ ,  $[^{68}\text{Ga}]\text{Ga-DOTA-(2P-PEG}_4)_2$ ,  $[^{68}\text{Ga}]\text{Ga-DOTA-(2P-PEG}_0)_2$ ,  $[^{68}\text{Ga}]\text{Ga-DOTA-(2P-PEG}_4)_2$ .

**Figure S5. The radiochemical purity by thinlayer chromatography of free  $^{68}\text{Ga}/^{177}\text{Lu}$  and**

[<sup>177</sup>Lu]Lu-DOTA-(2P-PEG<sub>4</sub>)<sub>2</sub>, [<sup>68</sup>Ga]Ga-DOTA-(1P-PEG<sub>4</sub>), [<sup>68</sup>Ga]Ga-DOTA-(2P-PEG<sub>0</sub>),  
 [<sup>68</sup>Ga]Ga-DOTA-(2P-PEG<sub>4</sub>) and [<sup>68</sup>Ga]Ga-DOTA-(2P-PEG<sub>4</sub>)<sub>2</sub>

**Table S1.** [<sup>68</sup>Ga]Ga-DOTA-(1P-PEG<sub>4</sub>), [<sup>68</sup>Ga]Ga-DOTA-(2P-PEG<sub>0</sub>), [<sup>68</sup>Ga]Ga-DOTA-(2P-PEG<sub>4</sub>), [<sup>68</sup>Ga]Ga-DOTA-(2P-PEG<sub>4</sub>)<sub>2</sub> corresponding tissue uptake values of PC-3 PIP tumor-bearing mice, expressed as Mean±SD, n=3.

|           | 30min                       |                             |                             |                                          | 60min                       |                             |                             |                                          | 120min                      |                             |                             |                                          |
|-----------|-----------------------------|-----------------------------|-----------------------------|------------------------------------------|-----------------------------|-----------------------------|-----------------------------|------------------------------------------|-----------------------------|-----------------------------|-----------------------------|------------------------------------------|
|           | DOTA-(1P-PEG <sub>4</sub> ) | DOTA-(2P-PEG <sub>0</sub> ) | DOTA-(2P-PEG <sub>4</sub> ) | DOTA-(2P-PEG <sub>4</sub> ) <sub>2</sub> | DOTA-(1P-PEG <sub>4</sub> ) | DOTA-(2P-PEG <sub>0</sub> ) | DOTA-(2P-PEG <sub>4</sub> ) | DOTA-(2P-PEG <sub>4</sub> ) <sub>2</sub> | DOTA-(1P-PEG <sub>4</sub> ) | DOTA-(2P-PEG <sub>0</sub> ) | DOTA-(2P-PEG <sub>4</sub> ) | DOTA-(2P-PEG <sub>4</sub> ) <sub>2</sub> |
| Heart     | 0.63±0.55                   | 0.63±0.14                   | 0.4±0.09                    | 0.83±0.22                                | 0.81±0.21                   | 0.22±0.06                   | 0.17±0.04                   | 0.35±0.12                                | 0.52±0.06                   | 0.08±0.04                   | 0.06±0.02                   | 0.09±0.03                                |
| Liver     | 0.62±0.32                   | 0.73±0.13                   | 0.44±0.08                   | 0.58±0.07                                | 0.48±0.17                   | 0.39±0.11                   | 0.24±0.02                   | 0.39±0.09                                | 0.51±0.17                   | 0.25±0.15                   | 0.19±0.04                   | 0.21±0.04                                |
| Spleen    | 1.17±0.84                   | 2.76±0.13                   | 3.34±0.72                   | 2.24±0.21                                | 1.18±0.39                   | 0.85±0.42                   | 0.91±0.38                   | 0.97±0.33                                | 1.46±0.49                   | 0.26±0.12                   | 0.59±0.15                   | 0.23±0.09                                |
| Lung      | 1.26±0.64                   | 1.98±0.34                   | 1.21±0.31                   | 1.75±0.13                                | 1.78±0.63                   | 0.55±0.09                   | 0.46±0.06                   | 0.83±0.16                                | 0.86±0.06                   | 0.19±0.03                   | 0.27±0.07                   | 0.24±0.07                                |
| Kidney    | 8.12±6.98                   | 41.28±1.09                  | 45.08±6.36                  | 58.35±2.69                               | 13.1±0.98                   | 15.83±3.88                  | 13.09±6.77                  | 28.87±3.12                               | 10.87±9.04                  | 3.86±1.05                   | 4.65±0.76                   | 4.76±2.63                                |
| Stomach   | 0.66±0.42                   | 0.78±0.19                   | 0.5±0.09                    | 0.77±0.1                                 | 0.76±0.06                   | 0.33±0.06                   | 0.2±0.1                     | 0.49±0.26                                | 0.69±0.07                   | 0.17±0.12                   | 0.16±0.07                   | 0.11±0.02                                |
| Intestine | 0.68±0.42                   | 0.83±0.33                   | 0.49±0.18                   | 0.86±0.15                                | 0.89±0.42                   | 0.64±0.55                   | 0.17±0.05                   | 0.42±0.21                                | 0.41±0.12                   | 0.14±0.03                   | 0.15±0.06                   | 0.1±0.01                                 |
| Muscle    | 0.34±0.25                   | 0.91±0.06                   | 0.46±0.31                   | 0.48±0.24                                | 1.48±1.56                   | 0.53±0.58                   | 0.18±0.1                    | 1.1±0.6                                  | 0.28±0.03                   | 0.06±0.05                   | 0.09±0.08                   | 0.08±0.04                                |
| Bone      | 0.27±0.24                   | 1.82±2.06                   | 0.28±0.07                   | 0.63±0.12                                | 0.8±0.56                    | 0.39±0.36                   | 0.16±0.13                   | 0.5±0.09                                 | 0.48±0.33                   | 0.04±0.06                   | 0.13±0.06                   | 0.32±0.18                                |
| Salivary  | 0.83±0.44                   | 1.2±0.28                    | 0.78±0.17                   | 0.73±0.31                                | 0.82±0.13                   | 0.34±0.11                   | 0.31±0.1                    | 0.61±0.16                                | 0.75±0.59                   | 0.14±0.03                   | 0.16±0.02                   | 0.17±0.03                                |
| Brain     | 0.11±0.12                   | 0.12±0.08                   | 0.04±0.01                   | 0.11±0.01                                | 0.39±0.4                    | 0.05±0.01                   | 0.03±0.01                   | 0.04±0.01                                | 0.17±0.03                   | 0.05±0.05                   | 0.01±0.01                   | 0.03±0.03                                |
| Blood     | 3.1±3.22                    | 5.21±4.25                   | 1.35±0.04                   | 2.23±0.42                                | 2.19±0.36                   | 2.24±2.65                   | 1.25±0.39                   | 0.75±0.41                                | 6.11±4.84                   | 2.78±1.08                   | 0.69±0.28                   | 1.14±1.43                                |
| Tumor     | 11.8±6.39                   | 23.91±2.67                  | 18.57±3.21                  | 23.05±2.66                               | 14.63±2.24                  | 15.12±1.69                  | 16.13±1.41                  | 28.89±1.82                               | 14.04±0.87                  | 14.29±4.62                  | 16.04±1.86                  | 121.85±3.53                              |

Values are expressed as % injected activity per gram of organ tissue. Each value represents the mean ± standard deviation.

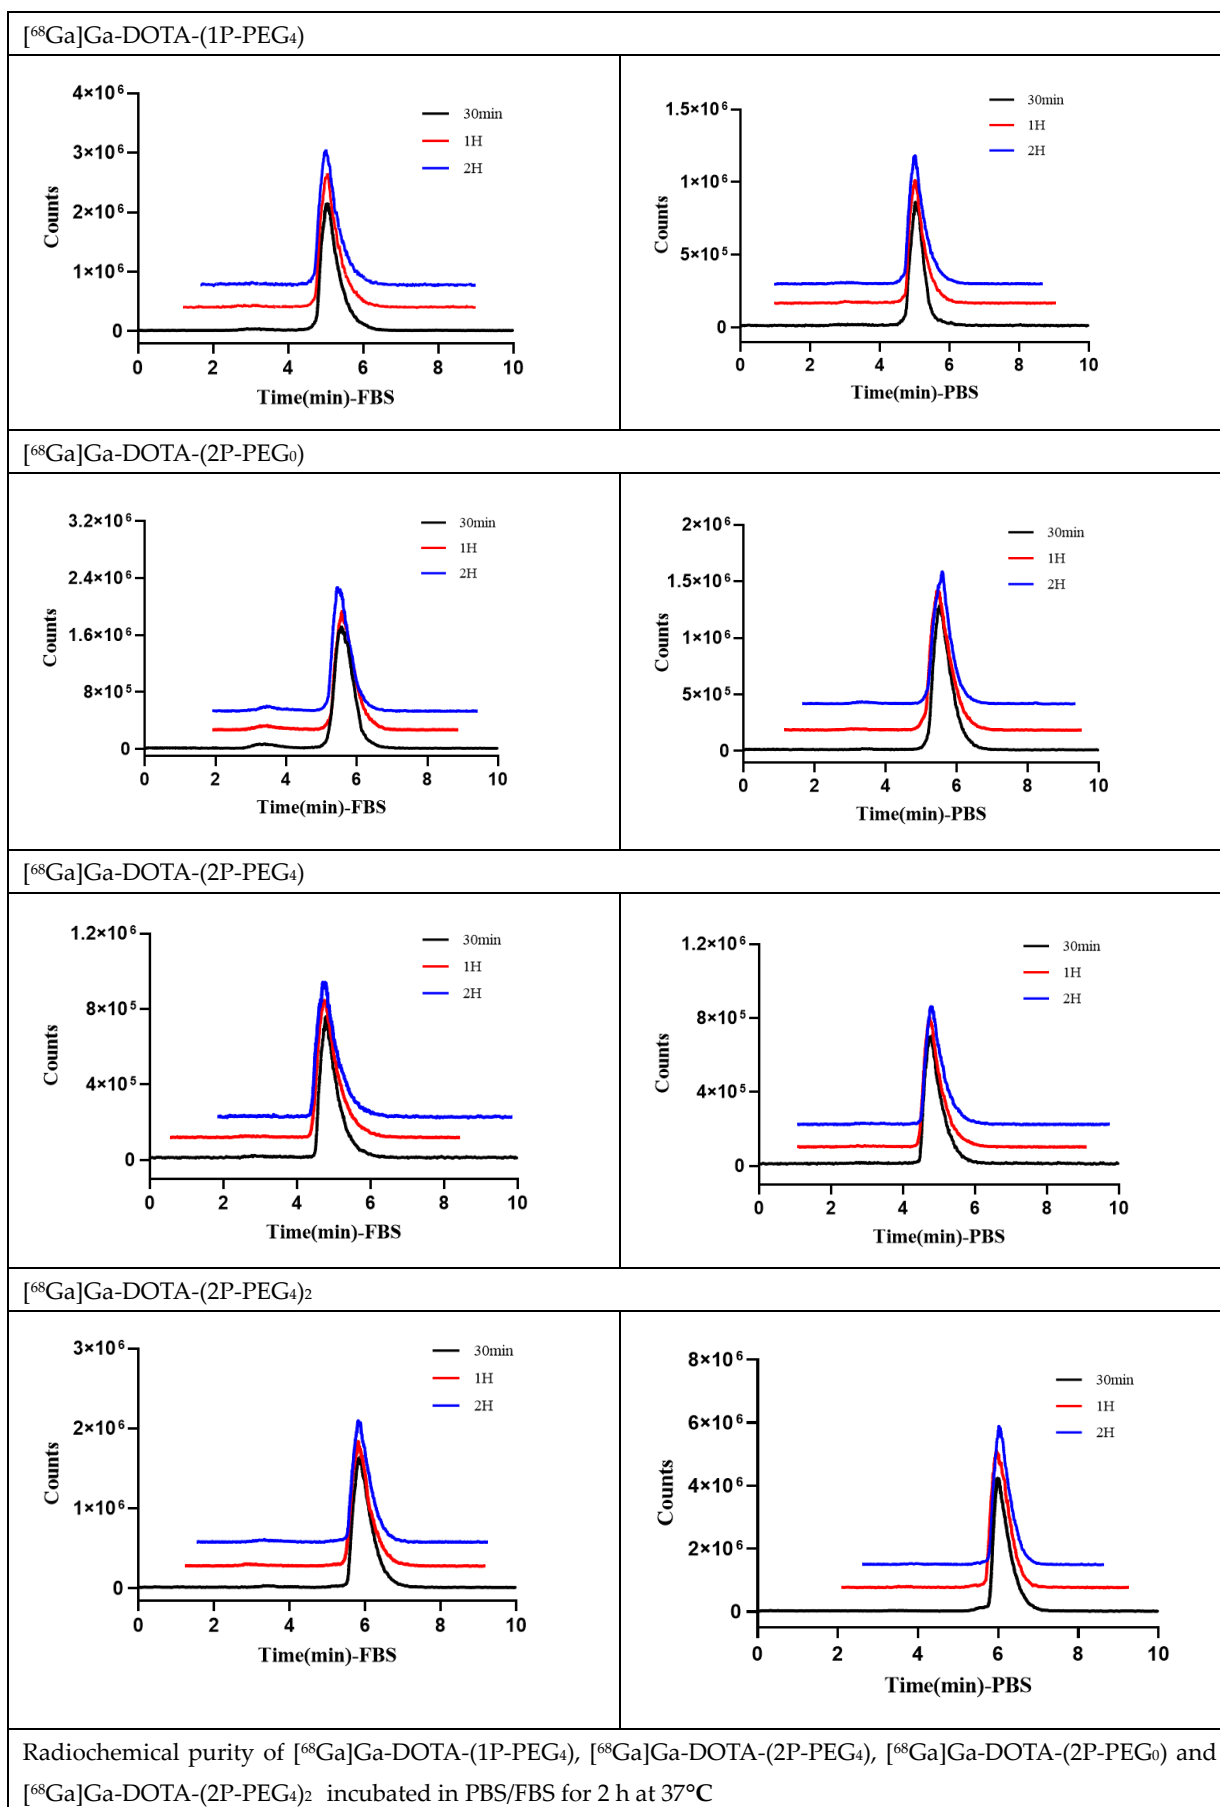

**Figure S6. The radiochemical purity by Radio-HPLC of  $[^{68}\text{Ga}]\text{Ga-DOTA-(1P-PEG}_4\text{)}$ ,**

**$[^{68}\text{Ga}]\text{Ga-DOTA-(2P-PEG}_0\text{)}$ ,  $[^{68}\text{Ga}]\text{Ga-DOTA-(2P-PEG}_4\text{)}$  and  $[^{68}\text{Ga}]\text{Ga-DOTA-(2P-PEG}_4\text{)}_2$  .**
